# Supplementary material for: Dynamics of Mutant Cells in Hierarchical Organized Tissues
Source: PubMed Central journal article supplement (PMC3228763; doi:10.1371/journal.pcbi.1002290), 2011-12-01

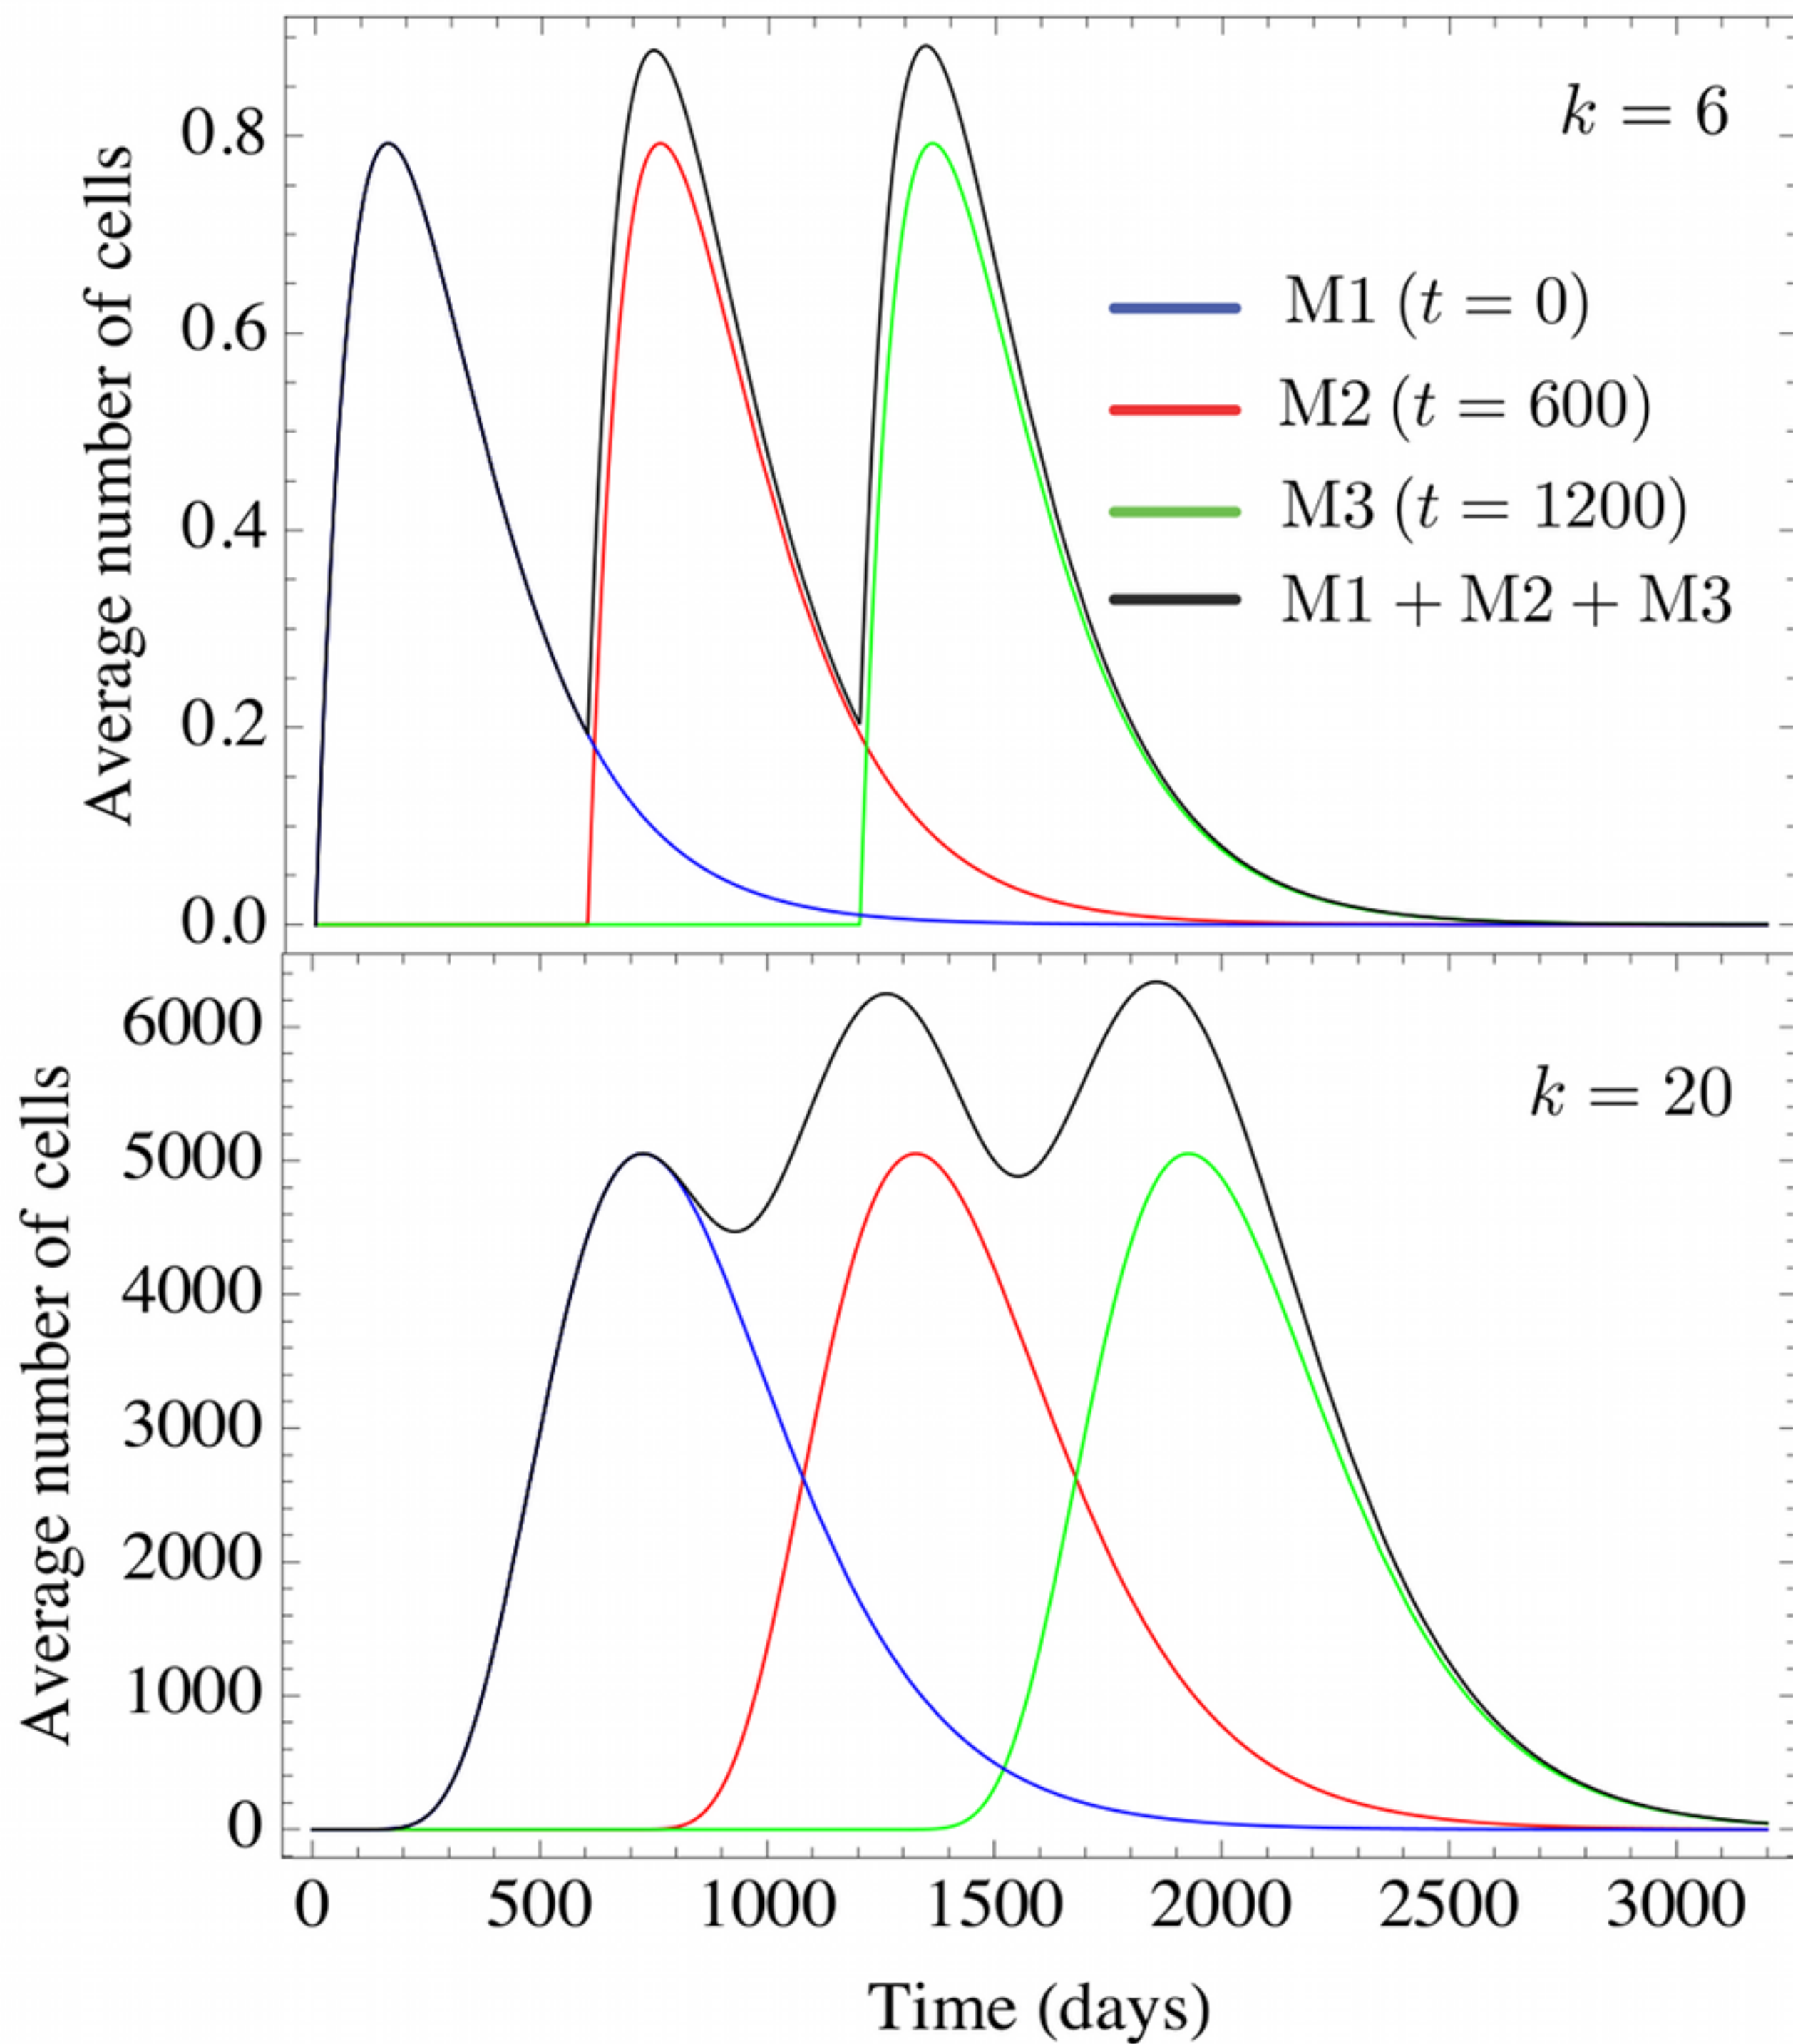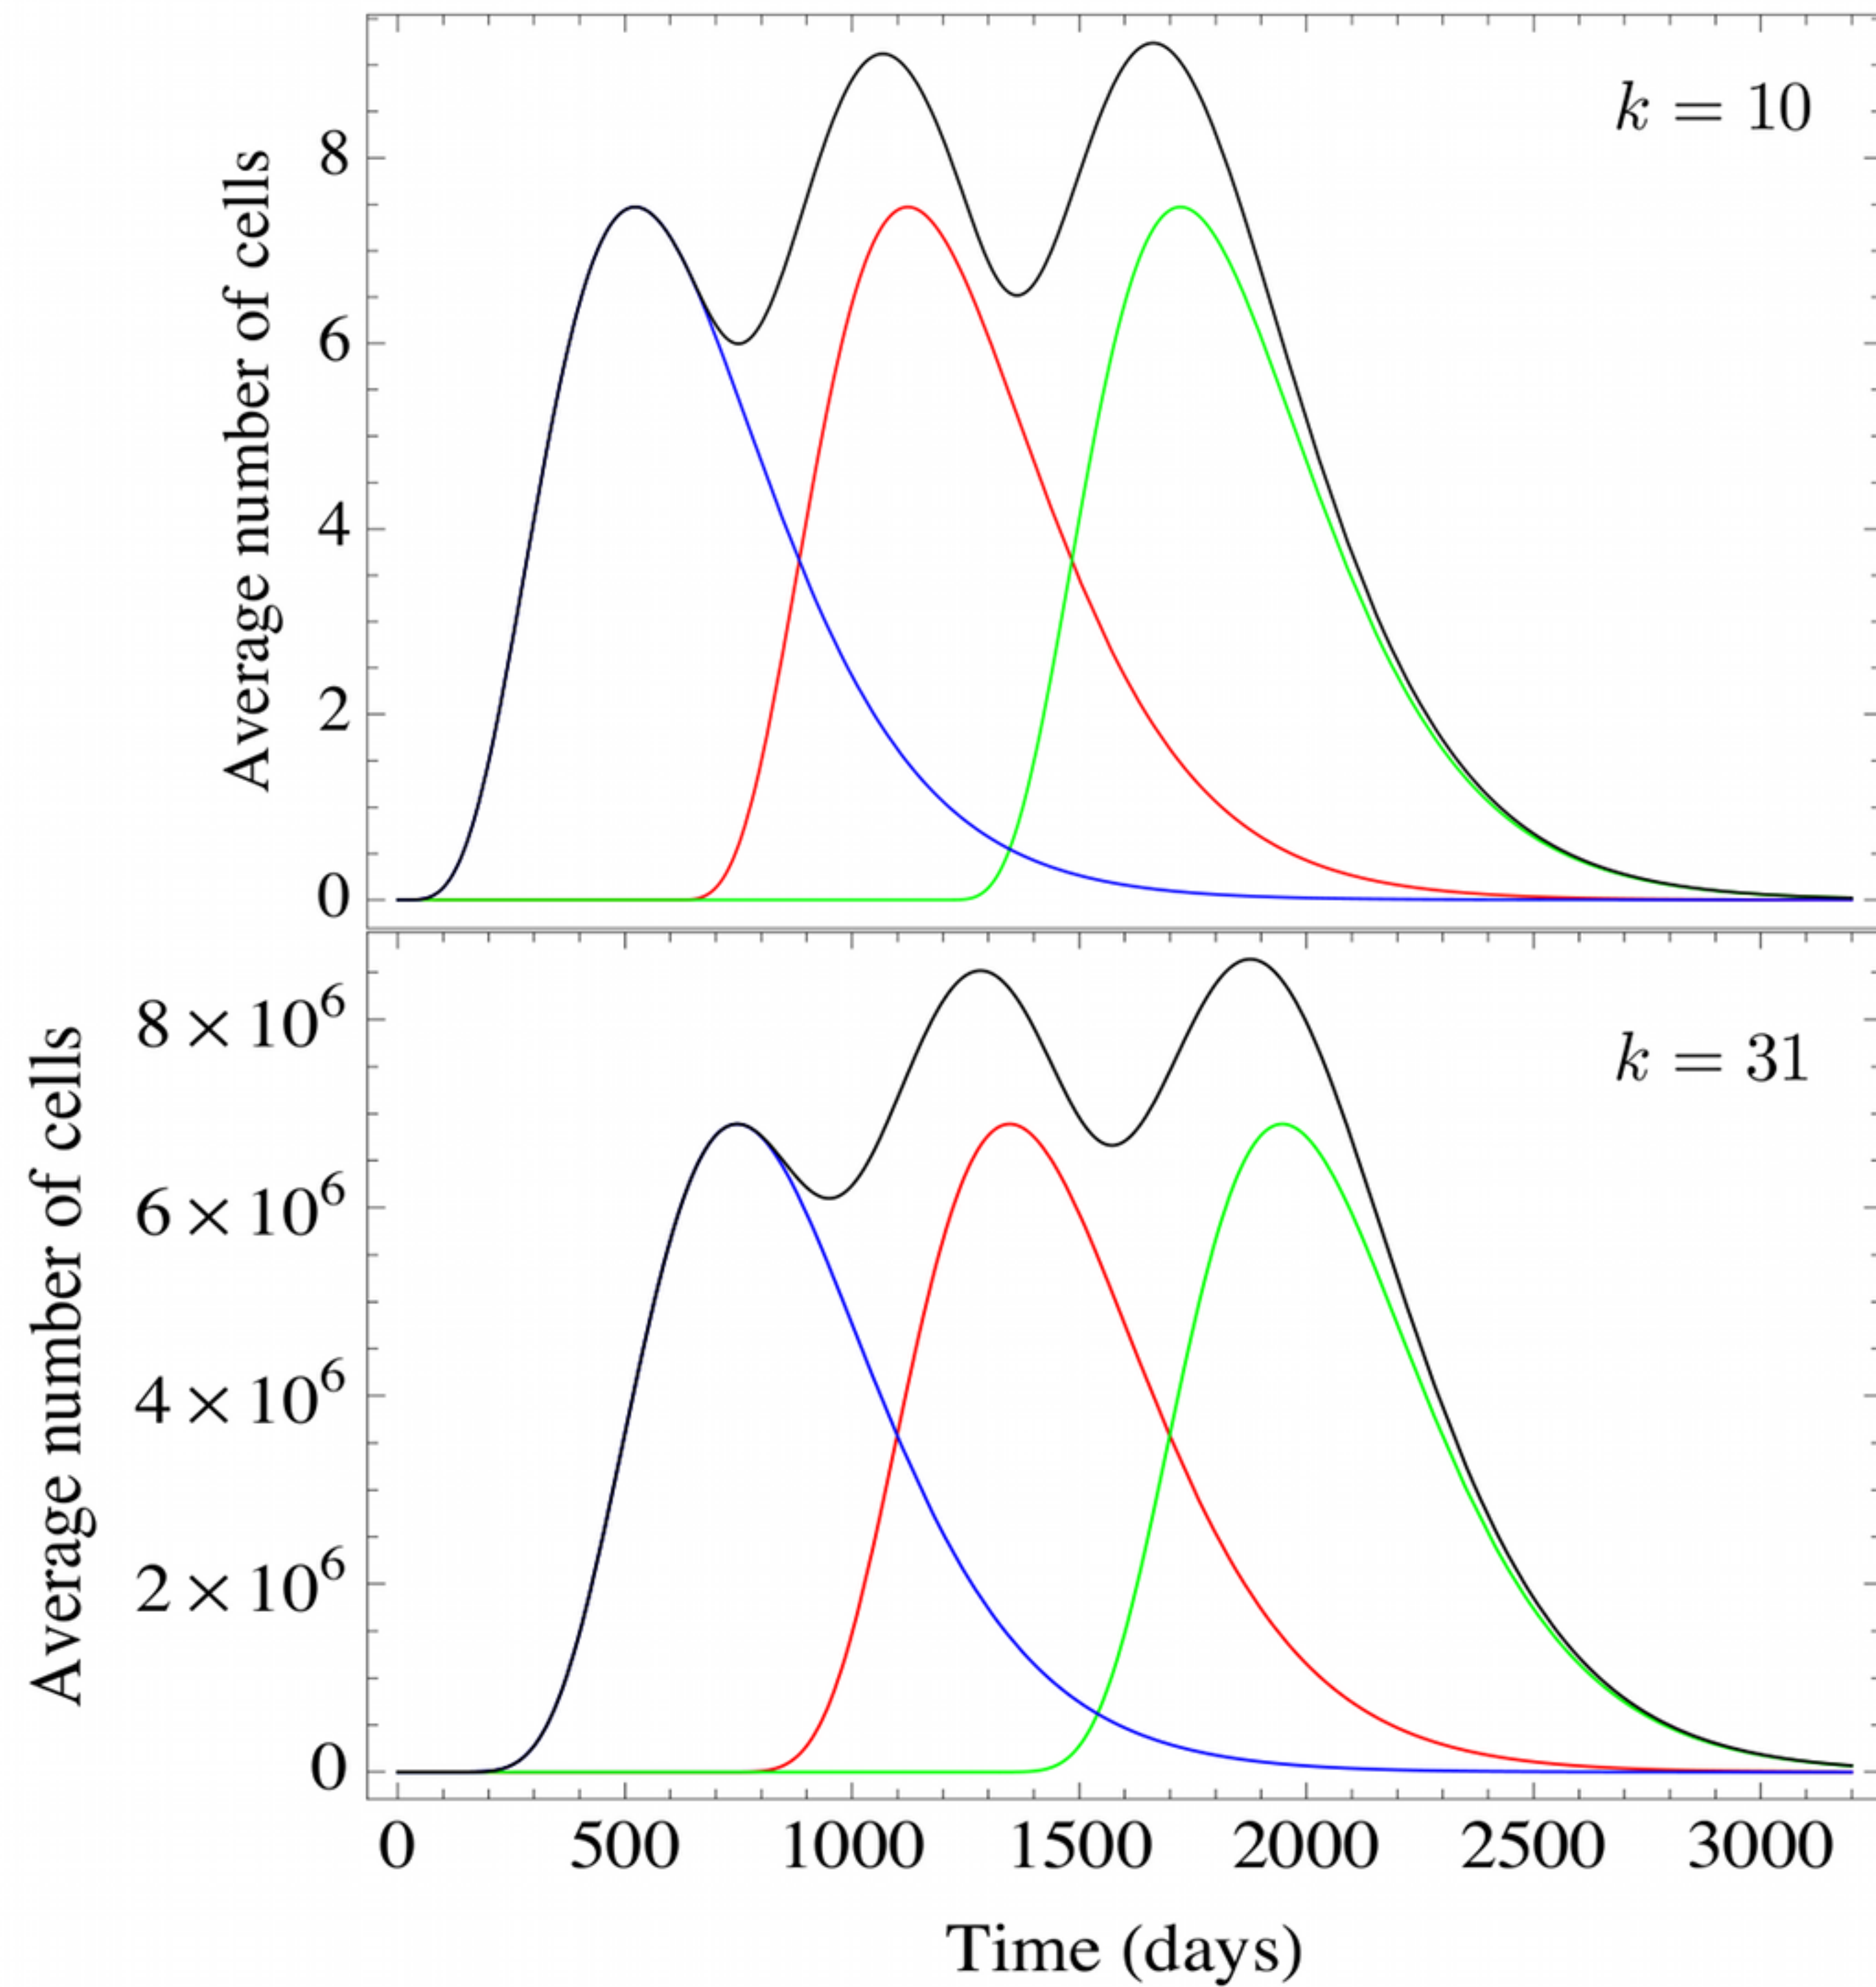

Supplement: pcbi.1002290.s001.pdf [file pcbi.1002290.s001.pdf]
